# Supplementary material
Source: Research Square preprint supplement (doi:10.21203/rs.3.rs-9157616/v1)
Supplement: Supplementary file 1 [file 9dcdac0a93fd2f467a0e9164.pdf]

# Supplementary Information of “Single-pair charge-2 Weyl–Dirac composite semimetals”

Hui-Jing Zheng<sup>\*</sup>, Ke-Xin Pang<sup>\*</sup>, Yun-Yun Bai, Yanfeng Ge, and Yan Gao<sup>†</sup>

*State Key Laboratory of Metastable Materials Science and Technology & Hebei Key Laboratory of Microstructural Material Physics, School of Science, Yanshan University, Qinhuangdao 066004, China*

---

<sup>\*</sup>These authors contributed equally to this work.

<sup>†</sup>Corresponding authors: yangao9419@ysu.edu.cn

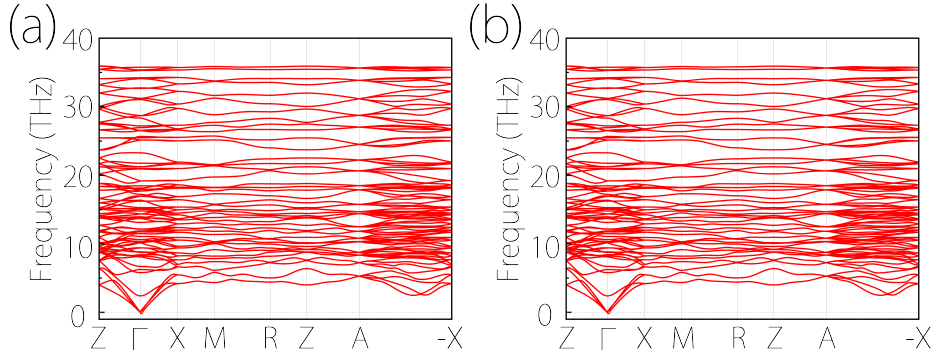

**Supplementary Figure S1 | Dynamical stability of the two chiral boron allotropes *l*-SDHBN- $\mathbf{B}_{28}$  and *r*-SDHBN- $\mathbf{B}_{28}$ .** Phonon spectrum of **a**, *l*-SDHBN- $\mathbf{B}_{28}$  and **b**, *r*-SDHBN- $\mathbf{B}_{28}$  calculated along the entire high-symmetry paths in the BZ.

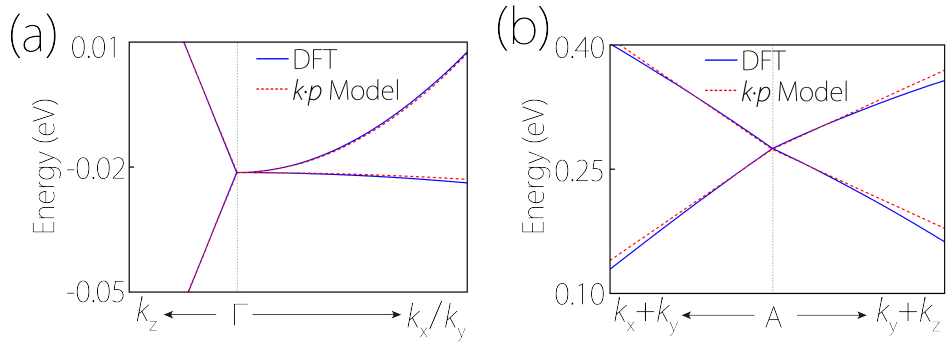

**Supplementary Figure S2 | The DFT versus the  $\mathbf{k} \cdot \mathbf{p}$  effective Hamiltonian band structures for SDHBN- $\mathbf{B}_{28}$ .** **a**, Band dispersion along  $k_z$  and  $k_x/k_y$  at  $\Gamma$  from DFT calculations (blue solid lines) and  $\mathbf{k} \cdot \mathbf{p}$  model fitting (red dashed lines). Parameters for the  $\mathbf{k} \cdot \mathbf{p}$  effective Hamiltonian:  $\epsilon_0 = -0.02 \text{ eV}$ ,  $m = -2.41 \text{ eV} \cdot \text{\AA}$ ,  $\epsilon_1 = 4.33 \text{ eV} \cdot \text{\AA}^2$ ,  $\epsilon_2 = 0.20 \text{ eV} \cdot \text{\AA}^2$ ,  $\alpha = 2.43 \text{ eV} \cdot \text{\AA}^2$ ,  $\beta = 4.03i \text{ eV} \cdot \text{\AA}^2$ . **b**, Band dispersion along  $k_x+k_y$  and  $k_y+k_z$  at A from DFT calculations (blue solid lines) and  $\mathbf{k} \cdot \mathbf{p}$  model fitting (red dashed lines). Parameters for the  $\mathbf{k} \cdot \mathbf{p}$  effective Hamiltonian:  $\alpha = 0.27 \text{ eV}$ ,  $\beta = 0.20 \text{ eV} \cdot \text{\AA}$ ,  $\gamma = 1.78 \text{ eV} \cdot \text{\AA}$ .

**Table SI.** Structural parameters and topological characteristics of representative boron allotropes. Listed are the space groups, lattice parameters (Å), lattice angles ( $^\circ$ ), Wyckoff positions, bond lengths (Å), densities ( $\text{g/cm}^3$ ), bulk modulus (GPa), total energies  $E_{\text{tot}}$  (eV per B atom) for  $l$ -SDHBN- $\text{B}_{28}$ ,  $r$ -SDHBN- $\text{B}_{28}$ , H-boron, Ort- $\text{B}_{32}$ , and 3D  $\alpha'$  boron. The corresponding topological phases are also indicated, including nodal-line semimetal (NLSM) states and charge-2 Weyl and Dirac nodes (C-2 WP and C-2 DP), which denote Weyl and Dirac points carrying a topological charge of  $|C| = 2$ , respectively.

| Structures                  | Space groups | Lattice parameters(Å) |      |      | Angles( $^\circ$ ) |         |          | Wyckoff position |         |         | Bond lengths (Å) | Densities ( $\text{g/cm}^3$ ) | Bulk modulus (GPa) | $E_{\text{tot}}$ (eV/B) | Properties |                  |
|-----------------------------|--------------|-----------------------|------|------|--------------------|---------|----------|------------------|---------|---------|------------------|-------------------------------|--------------------|-------------------------|------------|------------------|
|                             |              | $a$                   | $b$  | $c$  | $\alpha$           | $\beta$ | $\gamma$ | $x$              | $y$     | $z$     |                  |                               |                    |                         |            |                  |
| $l$ -SDHBN- $\text{B}_{28}$ | B1(8b)       | $P4_32_12$            | 6.66 | 6.66 | 6.00               | 90      | 90       | 90               | 0.7246  | 0.4705  | 1.4018           | 1.66-1.99                     | 1.89               | 168.66                  | -6.26      | C-2 WP<br>C-2 DP |
|                             | B2(8b)       |                       |      |      |                    |         |          | 0.9932           | 0.1019  | 1.3884  |                  |                               |                    |                         |            |                  |
|                             | B3(8b)       |                       |      |      |                    |         |          | 0.1043           | 0.4616  | 1.0904  |                  |                               |                    |                         |            |                  |
|                             | B4(4a)       |                       |      |      |                    |         |          | 0.7623           | 0.2378  | 1.2500  |                  |                               |                    |                         |            |                  |
| $r$ -SDHBN- $\text{B}_{28}$ | B1(8b)       | $P4_12_12$            | 6.66 | 6.66 | 6.00               | 90      | 90       | 90               | 0.2754  | 0.5295  | 0.0982           | 1.66-1.99                     | 1.89               | 168.65                  | -6.26      | C-2 WP<br>C-2 DP |
|                             | B2(8b)       |                       |      |      |                    |         |          | 0.0069           | 0.8981  | 0.1116  |                  |                               |                    |                         |            |                  |
|                             | B3(8b)       |                       |      |      |                    |         |          | 0.8957           | 0.5384  | 0.4096  |                  |                               |                    |                         |            |                  |
|                             | B4(4a)       |                       |      |      |                    |         |          | 0.2378           | 0.7623  | 0.2500  |                  |                               |                    |                         |            |                  |
| H-boron                     | B1(12k)      | $P6_3/mmc$            | 6.06 | 6.06 | 9.91               | 90      | 90       | 120              | 0.5727  | 0.4273  | 0.5277           | 1.62-1.71                     | 0.91               | 70.83                   | -5.84      | NLSM             |
|                             | B2(4f)       |                       |      |      |                    |         |          | 0.3333           | 0.6667  | 0.3319  |                  |                               |                    |                         |            |                  |
| Ort- $\text{B}_{32}$        | B1(16h)      | $Cmcm$                | 6.61 | 8.09 | 4.95               | 90      | 90       | 90               | -0.6230 | -0.2970 | 1.4600           | 1.63-2.09                     | 2.17               | 193.76                  | -6.29      | NLSM             |
|                             | B2(8f)       |                       |      |      |                    |         |          | -0.5000          | 0.0870  | 0.5860  |                  |                               |                    |                         |            |                  |
|                             | B3(8g)       |                       |      |      |                    |         |          | -0.2690          | -0.1530 | 1.2500  |                  |                               |                    |                         |            |                  |
| 3D $\alpha'$ boron          | B1(16h)      | $Cmcm$                | 7.73 | 8.23 | 5.07               | 90      | 90       | 90               | 0.1696  | 0.7072  | 0.0837           | 1.66-1.85                     | 1.78               | 166.86                  | -6.36      | NLSM             |
|                             | B2(8g)       |                       |      |      |                    |         |          | 0.1778           | 0.3063  | 0.2500  |                  |                               |                    |                         |            |                  |
|                             | B3(8f)       |                       |      |      |                    |         |          | -0.0000          | 0.5992  | 0.9325  |                  |                               |                    |                         |            |                  |

**Table SII.** Elastic constants and corresponding stability criteria for  $l$ -SDHBN- $\text{B}_{28}$  and  $r$ -SDHBN- $\text{B}_{28}$ .

| Structures                  | Elasticity constants |          |          |          |          |          | Stability criteria                                                                           |
|-----------------------------|----------------------|----------|----------|----------|----------|----------|----------------------------------------------------------------------------------------------|
|                             | $C_{11}$             | $C_{12}$ | $C_{13}$ | $C_{33}$ | $C_{44}$ | $C_{66}$ |                                                                                              |
| $l$ -SDHBN- $\text{B}_{28}$ | 303.475              | 100.345  | 103.458  | 296.467  | 165.259  | 178.657  | $C_{11} >  C_{12} $ ; $2C_{13}^2 < C_{33}(C_{11} + C_{12})$ ;<br>$C_{44} > 0$ ; $C_{66} > 0$ |
| $r$ -SDHBN- $\text{B}_{28}$ | 303.463              | 100.331  | 103.452  | 296.437  | 165.255  | 178.648  |                                                                                              |

**Table SIII.** Energies, coordinates, topological charges, and multiplicities of the C-2 WP and C-2 DP in  $l$ -SDHBN- $\text{B}_{28}$  and  $r$ -SDHBN- $\text{B}_{28}$ .

| Structures                  |    | $E$ (eV) | Coordinate ( $k_1, k_2, k_3$ ) | Charge | Multiplicity |
|-----------------------------|----|----------|--------------------------------|--------|--------------|
| $l$ -SDHBN- $\text{B}_{28}$ | WP | -0.020   | (0,0,0)                        | +2     | 1            |
|                             | DP | 0.274    | (0.5, 0.5, 0.5)                | -2     | 1            |
| $r$ -SDHBN- $\text{B}_{28}$ | WP | -0.017   | (0,0,0)                        | -2     | 1            |
|                             | DP | 0.277    | (0.5, 0.5, 0.5)                | +2     | 1            |

**Table SIV.** All possible magnetic space groups that can host single-pair charge-2 Weyl–Dirac nodes. MSG No. indicates the magnetic space group number. HSP (HSL) refer to the high-symmetry point (high-symmetry line) where the charge-2 Weyl point (WP) and Dirac point (DP) are located. C-2 WP and C-2 DP represent Weyl and Dirac nodes carrying a topological charge of  $|C| = 2$ , respectively. IRR denotes the irreducible (co)representation of the corresponding little group at the  $|C| = 2$  WP or DP.

| MSG No.                     | Generators                                                                                                                                        | HSP/ HSL for C-2 DP (Irreps) | HSP/ HSL for C-2 WP (Irreps)                                   |
|-----------------------------|---------------------------------------------------------------------------------------------------------------------------------------------------|------------------------------|----------------------------------------------------------------|
| Type-II MSGs (without SOC)  |                                                                                                                                                   |                              |                                                                |
| 92.112                      | $\{C_{4z}^+   00\frac{1}{4}\},$<br>$\{C_{2x}   \frac{1}{2}\frac{1}{2}0\},$<br>T                                                                   | A( $\{R_6, R_7\}$ )          | $\Gamma(R_5)$                                                  |
| 96.144                      | $\{C_{4z}^+   00\frac{3}{4}\},$<br>$\{C_{2x}   \frac{1}{2}\frac{1}{2}0\},$<br>T                                                                   | A( $\{R_6, R_7\}$ )          | $\Gamma(R_5)$                                                  |
| Type-III MSGs (without SOC) |                                                                                                                                                   |                              |                                                                |
| 90.98                       | $\{C_{4z}^+   000\},$<br>$\{C_{2x}T   \frac{1}{2}\frac{1}{2}0\}$                                                                                  | MA( $\{V_1V_3, V_2V_4\}$ )   | $\Gamma Z(\{\Lambda_1, \Lambda_3\}; \{\Lambda_2, \Lambda_4\})$ |
| 92.114                      | $\{C_{4z}^+   00\frac{1}{4}\},$<br>$\{C_{2x}T   \frac{1}{2}\frac{1}{2}0\}$                                                                        | MA( $\{V_1V_3, V_2V_4\}$ )   | $\Gamma Z(\{\Lambda_1, \Lambda_3\}; \{\Lambda_2, \Lambda_4\})$ |
| 92.115                      | $\{C_{2a}   \frac{1}{2}\frac{1}{2}\frac{1}{4}\},$<br>$\{C_{2b}   \frac{1}{2}\frac{1}{2}\frac{3}{4}\},$<br>$\{C_{2x}T   \frac{1}{2}\frac{1}{2}0\}$ | A( $T_1T_2$ )                | $\Gamma(\Gamma_2\Gamma_4)$                                     |
| 94.130                      | $\{C_{4z}^+   00\frac{1}{2}\},$<br>$\{C_{2x}T   \frac{1}{2}\frac{1}{2}0\}$                                                                        | MA( $\{V_1V_3, V_2V_4\}$ )   | $\Gamma Z(\{\Lambda_1, \Lambda_3\}; \{\Lambda_2, \Lambda_4\})$ |
| 96.146                      | $\{C_{4z}^+   00\frac{3}{4}\},$                                                                                                                   | MA( $\{V_1V_3, V_2V_4\}$ )   | $\Gamma Z(\{\Lambda_1, \Lambda_3\}; \{\Lambda_2, \Lambda_4\})$ |

| MSG No.                    | Generators                                                                                                                                                                                                                                                                      | HSP/ HSL for C-2 DP (Irreps) | HSP/ HSL for C-2 WP (Irreps)                                   |
|----------------------------|---------------------------------------------------------------------------------------------------------------------------------------------------------------------------------------------------------------------------------------------------------------------------------|------------------------------|----------------------------------------------------------------|
|                            | $\{C_{2x}T \left  \begin{smallmatrix} 1 & 1 \\ 2 & 2 \end{smallmatrix} \right. 0\}$                                                                                                                                                                                             |                              |                                                                |
| 96.147                     | $\{C_{2a} \left  \begin{smallmatrix} 1 & 1 & 3 \\ 2 & 2 & 4 \end{smallmatrix} \right. \},$<br>$\{C_{2b} \left  \begin{smallmatrix} 1 & 1 & 1 \\ 2 & 2 & 4 \end{smallmatrix} \right. \},$<br>$\{C_{2x}T \left  \begin{smallmatrix} 1 & 1 \\ 2 & 2 \end{smallmatrix} \right. 0\}$ | $A(T_1 T_2)$                 | $\Gamma(\Gamma_2 \Gamma_4)$                                    |
| Type-III MSGs (with SOC)   |                                                                                                                                                                                                                                                                                 |                              |                                                                |
| 90.98                      | $\{C_{4z}^+   000\},$<br>$\{C_{2x}T \left  \begin{smallmatrix} 1 & 1 \\ 2 & 2 \end{smallmatrix} \right. 0\}$                                                                                                                                                                    | $MA(\{V_5 V_7, V_6 V_8\})$   | $\Gamma Z(\{\Lambda_5, \Lambda_7\}; \{\Lambda_6, \Lambda_8\})$ |
| 92.114                     | $\{C_{4z}^+   00 \frac{1}{4}\},$<br>$\{C_{2x}T \left  \begin{smallmatrix} 1 & 1 \\ 2 & 2 \end{smallmatrix} \right. 0\}$                                                                                                                                                         | $MA(\{V_5 V_7, V_6 V_8\})$   | $\Gamma Z(\{\Lambda_5, \Lambda_7\}; \{\Lambda_6, \Lambda_8\})$ |
| 92.115                     | $\{C_{2a} \left  \begin{smallmatrix} 1 & 1 & 1 \\ 2 & 2 & 4 \end{smallmatrix} \right. \},$<br>$\{C_{2b} \left  \begin{smallmatrix} 1 & 1 & 3 \\ 2 & 2 & 4 \end{smallmatrix} \right. \},$<br>$\{C_{2x}T \left  \begin{smallmatrix} 1 & 1 \\ 2 & 2 \end{smallmatrix} \right. 0\}$ | $M(Y_5 Y_5)$                 | $Z(Z_2 Z_3)$                                                   |
| 94.130                     | $\{C_{4z}^+   00 \frac{1}{2}\},$<br>$\{C_{2x}T \left  \begin{smallmatrix} 1 & 1 \\ 2 & 2 \end{smallmatrix} \right. 0\}$                                                                                                                                                         | $MA(\{V_5 V_7, V_6 V_8\})$   | $\Gamma Z(\{\Lambda_5, \Lambda_7\}; \{\Lambda_6, \Lambda_8\})$ |
| 96.146                     | $\{C_{4z}^+   00 \frac{3}{4}\},$<br>$\{C_{2x}T \left  \begin{smallmatrix} 1 & 1 \\ 2 & 2 \end{smallmatrix} \right. 0\}$                                                                                                                                                         | $MA(\{V_5 V_7, V_6 V_8\})$   | $\Gamma Z(\{\Lambda_5, \Lambda_7\}; \{\Lambda_6, \Lambda_8\})$ |
| 96.147                     | $\{C_{2a} \left  \begin{smallmatrix} 1 & 1 & 3 \\ 2 & 2 & 4 \end{smallmatrix} \right. \},$<br>$\{C_{2b} \left  \begin{smallmatrix} 1 & 1 & 1 \\ 2 & 2 & 4 \end{smallmatrix} \right. \},$<br>$\{C_{2x}T \left  \begin{smallmatrix} 1 & 1 \\ 2 & 2 \end{smallmatrix} \right. 0\}$ | $M(Y_5 Y_5)$                 | $Z(Z_4 Z_5)$                                                   |
| Type-IV MSGs (without SOC) |                                                                                                                                                                                                                                                                                 |                              |                                                                |
| 91.109                     | $\{C_{4z}^+   00 \frac{1}{4}\},$<br>$\{C_{2x}   000\},$<br>$\{T \left  \begin{smallmatrix} 1 & 1 \\ 2 & 2 \end{smallmatrix} \right. 0\}$                                                                                                                                        | $A(A_1 A_2)$                 | $\Gamma(\Gamma_5)$                                             |

| MSG No.                 | Generators                                                                                      | HSP/ HSL for C-2 DP (Irreps) | HSP/ HSL for C-2 WP (Irreps) |
|-------------------------|-------------------------------------------------------------------------------------------------|------------------------------|------------------------------|
| 91.110                  | $\{C_{4z}^+   00 \frac{1}{4}\},$<br>$\{C_{2x}   000\},$<br>$\{T   \frac{111}{222}\}$            | $A(A_1A_2)$                  | $\Gamma(\Gamma_5)$           |
| 92.116                  | $\{C_{4z}^+   00 \frac{1}{4}\},$<br>$\{C_{2x}   \frac{11}{22} 0\},$<br>$\{T   00 \frac{1}{2}\}$ | $A(A_1A_2)$                  | $\Gamma(\Gamma_5)$           |
| 95.141                  | $\{C_{4z}^+   00 \frac{3}{4}\},$<br>$\{C_{2x}   000\},$<br>$\{T   \frac{11}{22} 0\}$            | $A(A_1A_2)$                  | $\Gamma(\Gamma_5)$           |
| 95.142                  | $\{C_{4z}^+   00 \frac{3}{4}\},$<br>$\{C_{2x}   000\},$<br>$\{T   \frac{111}{222}\}$            | $A(A_1A_2)$                  | $\Gamma(\Gamma_5)$           |
| 96.148                  | $\{C_{4z}^+   00 \frac{3}{4}\},$<br>$\{C_{2x}   \frac{11}{22} 0\},$<br>$\{T   00 \frac{1}{2}\}$ | $A(A_1A_2)$                  | $\Gamma(\Gamma_5)$           |
| Type-IV MSGs (with SOC) |                                                                                                 |                              |                              |
| 91.110                  | $\{C_{4z}^+   00 \frac{1}{4}\},$<br>$\{C_{2x}   000\},$<br>$\{T   \frac{111}{222}\}$            | $M(M_6M_7)$                  | $Z(Z_7)$                     |
| 92.116                  | $\{C_{4z}^+   00 \frac{1}{4}\},$<br>$\{C_{2x}   \frac{11}{22} 0\},$<br>$\{T   00 \frac{1}{2}\}$ | $M(M_6M_7)$                  | $Z(Z_7)$                     |
| 95.142                  | $\{C_{4z}^+   00 \frac{3}{4}\},$<br>$\{C_{2x}   000\},$                                         | $M(M_6M_7)$                  | $Z(Z_7)$                     |

| MSG No. | Generators                                                                                                                                                                       | HSP/ HSL for C-2 DP (Irreps) | HSP/ HSL for C-2 WP (Irreps) |
|---------|----------------------------------------------------------------------------------------------------------------------------------------------------------------------------------|------------------------------|------------------------------|
|         | $\{T \left  \begin{smallmatrix} 1 & 1 & 1 \\ 2 & 2 & 2 \end{smallmatrix} \right. \}$                                                                                             |                              |                              |
| 96.148  | $\{C_{4z}^+ \left  00 \frac{3}{4} \right. \},$<br>$\{C_{2x} \left  \begin{smallmatrix} 1 & 1 \\ 2 & 2 \end{smallmatrix} 0 \right. \},$<br>$\{T \left  00 \frac{1}{2} \right. \}$ | $M(M_6M_7)$                  | $Z(Z_7)$                     |
